# Supplementary material for: The effect of the nanofibrous Al2O3aspect ratio on Fischer–Tropsch synthesis over cobalt catalysts
Source: Royal Society of Chemistry journal article supplement (doi:10.1039/c6nr07529k), 2016-11-07
Supplement: c6nr07529k1.pdf [file c6nr07529k1.pdf]

## Supporting Information

### **The effect of nanofibrous Al<sub>2</sub>O<sub>3</sub> aspect ratio on Fischer-Tropsch synthesis over cobalt catalysts**

Chengchao Liu,<sup>a</sup> Yuhua Zhang,<sup>b</sup> Yanxi Zhao,<sup>b</sup> Liang Wei,<sup>c</sup> Jingping Hong,<sup>b</sup> Li Wang,<sup>b</sup> Sufang Chen,<sup>d</sup> Guanghui Wang<sup>\*a</sup> and Jinlin Li<sup>\*b</sup>

<sup>a</sup> Hubei Key Laboratory of Coal Conversion and New Carbon Material, School of Chemical Engineering and Technology, Wuhan University of Science and Technology, Wuhan 430081, China

<sup>b</sup> Key Laboratory of Catalysis and Materials Science of the State Ethnic Affairs Commission & Ministry of Education, South-Central University for Nationalities, Wuhan 430074, China.

<sup>c</sup> College of Chemistry and Material Science, Guangxi Teachers Education University, Nanning 530001, China

<sup>d</sup> Key Laboratory for Green Chemical Process of Ministry of Education, Hubei Key Laboratory of Novel Reactor and Green Chemical Technology, School of Chemical Engineering and Pharmacy, Wuhan Institute of Technology, Wuhan 430073, China.

Information of corresponding author

Tel.: +86 27 67843016 Fax: +86 27 67842752

\*E-mail address: jinlinli@aliyun.com (Jinlin Li)

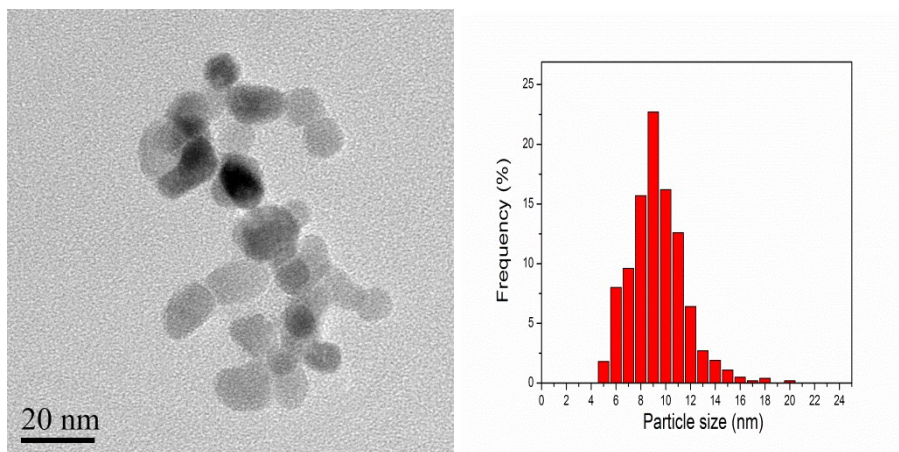

**Figure S1.** TEM images  $\text{Co}_3\text{O}_4$  nanoparticles and the histograms of the  $\text{Co}_3\text{O}_4$  particle size.

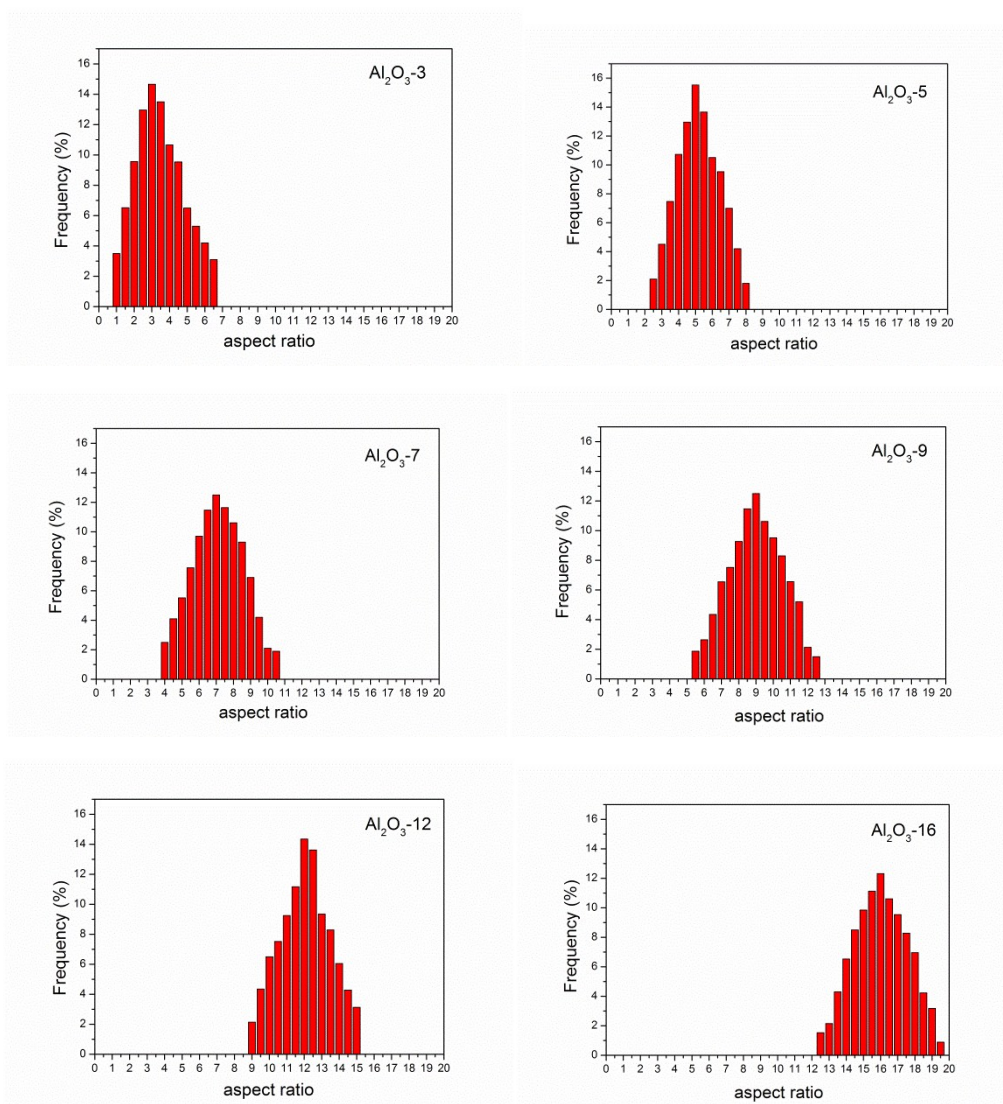

**Figure S2.** The histograms of the average aspect ratio of nanofibrous alumina.

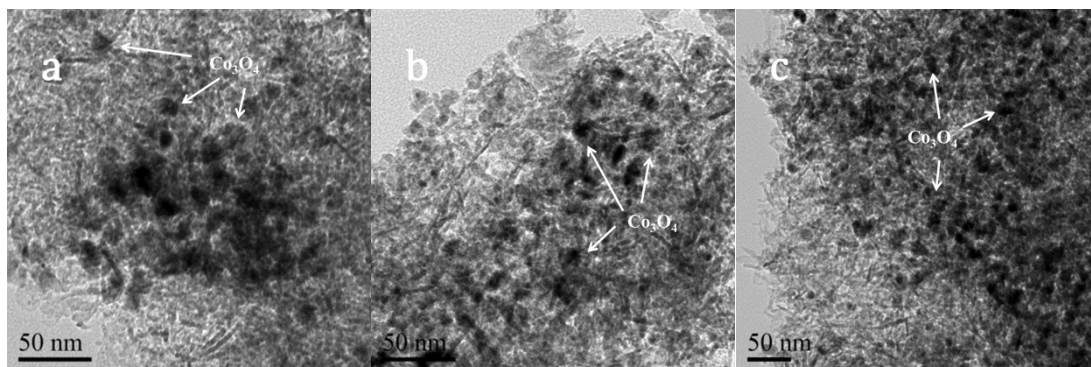

**Figure S3.** TEM images of the catalysts ( $\text{Co}_3\text{O}_4$  highlighted by white arrows): (a)  $\text{Co}_p/\text{Al}_2\text{O}_3$ -9; (b)  $\text{Co}_p/\text{Al}_2\text{O}_3$ -12 and (c)  $\text{Co}_p/\text{Al}_2\text{O}_3$ -16.

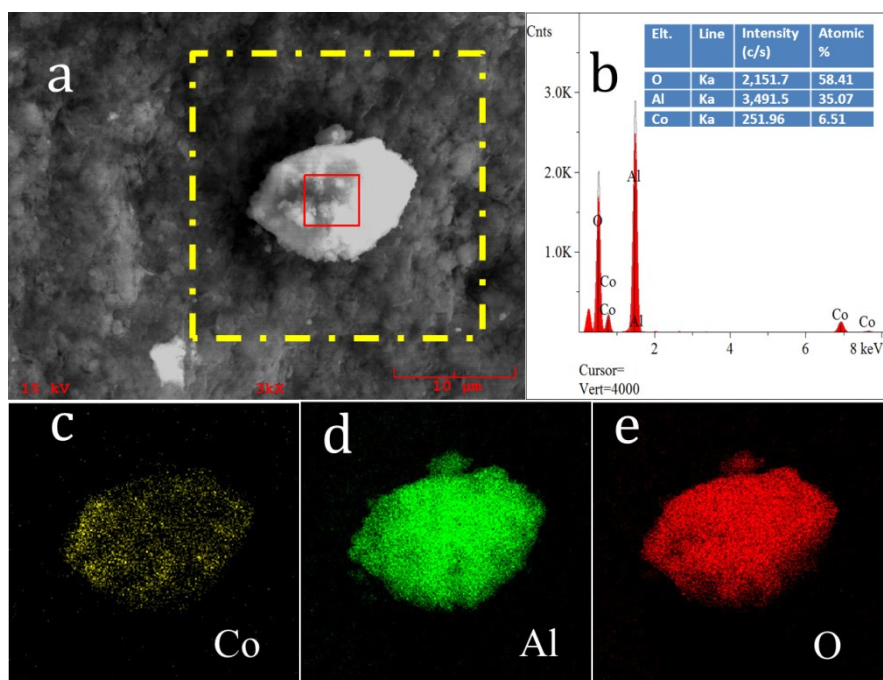

**Figure S4.** SEM-EDS elemental mapping images for Co, Al, and O of the corresponding region (yellow frame) of  $\text{Co}_p/\text{Al}_2\text{O}_3$ -16.

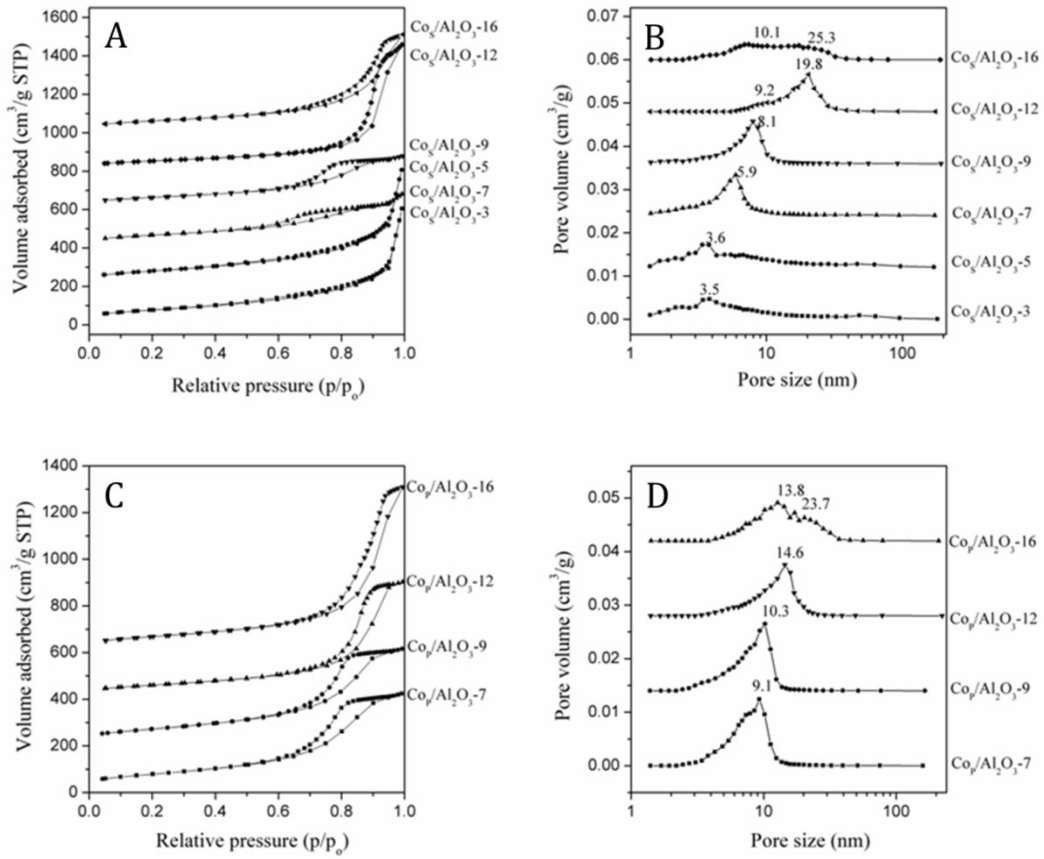

**Figure S5.** Nitrogen adsorption/desorption isotherms (A for impregnated catalysts, C for rearranged catalysts) and pore size distributions of the catalysts (B for impregnated catalysts, D rearranged catalysts).

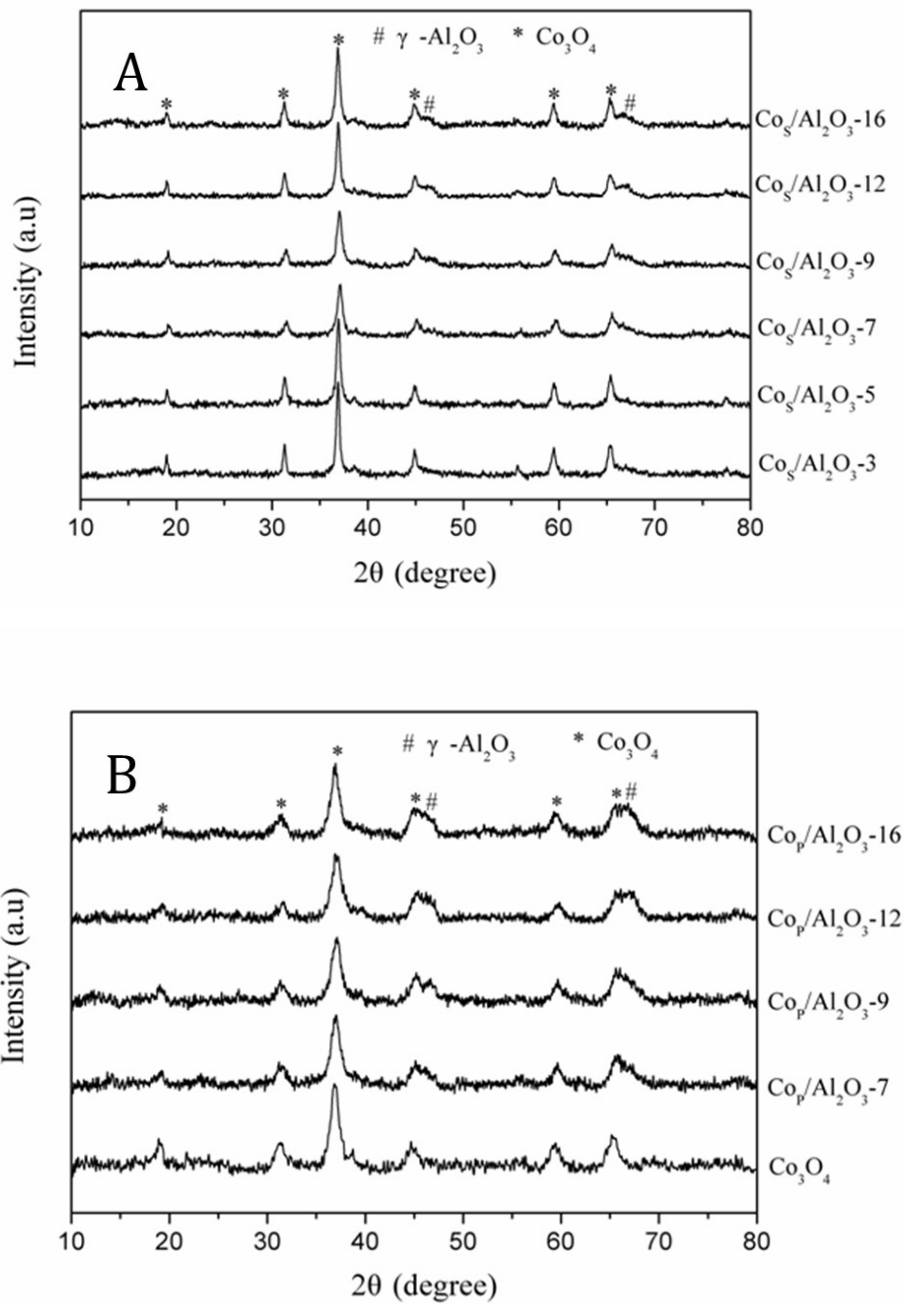

**Figure S6.** Powder XRD patterns of the catalysts and prepared  $\text{Co}_3\text{O}_4$  nanoparticles.

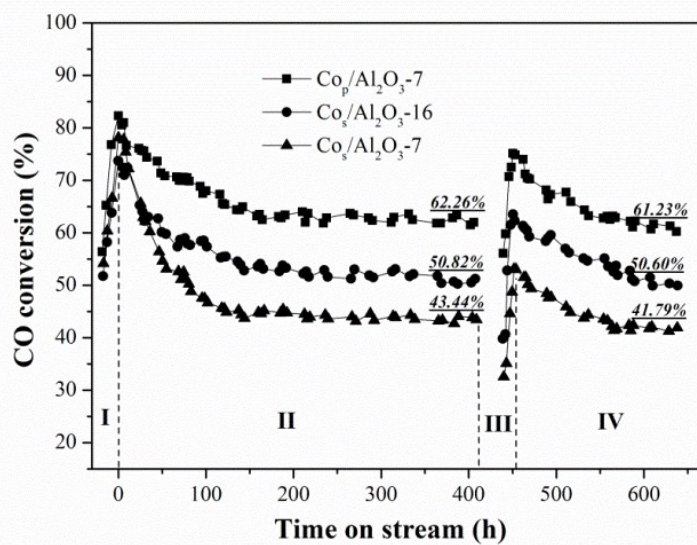

**Figure S7.** CO conversion as a function of time on stream. After reduced, the reactor temperature was increased slowly to 503 K (Period I), run at 1.0MPa, 503K, GHSV = 3.2 SL•g<sup>-1</sup>•h<sup>-1</sup>, 2.9 SL•g<sup>-1</sup>•h<sup>-1</sup> and 6.5 SL•g<sup>-1</sup>•h<sup>-1</sup> for catalyst Co<sub>s</sub>/Al<sub>2</sub>O<sub>3</sub>-7, Co<sub>s</sub>/Al<sub>2</sub>O<sub>3</sub>-16 and Co<sub>p</sub>/Al<sub>2</sub>O<sub>3</sub>-7, respectively (Period II and IV), re-reduced treatment in flowing N<sub>2</sub>/H<sub>2</sub> (1:1, 6 NL h<sup>-1</sup> g<sup>-1</sup>) for 10 h at 503 K.

**Table S1.** The synthesis condition of nanofibers alumina with various aspect ratios.

| Sample                             | Amount of acetic acid added<br>(mL) | Aging temperature<br>(K) | Average aspect ratio of sample |
|------------------------------------|-------------------------------------|--------------------------|--------------------------------|
| Al <sub>2</sub> O <sub>3</sub> -3  | 1.0                                 | 333                      | 3                              |
| Al <sub>2</sub> O <sub>3</sub> -5  | 1.0                                 | 353                      | 5                              |
| Al <sub>2</sub> O <sub>3</sub> -7  | 0.5                                 | 353                      | 7                              |
| Al <sub>2</sub> O <sub>3</sub> -9  | 0                                   | 353                      | 9                              |
| Al <sub>2</sub> O <sub>3</sub> -12 | 0                                   | 373                      | 12                             |

**Table S2.** Nitrogen adsorption results and crystallite size of the nanofibrous Al<sub>2</sub>O<sub>3</sub> supports.

| sample                             | BJH pore size<br>(nm) | Average pore<br>size <sup>a</sup><br>(nm) | S <sub>BET</sub><br>(m <sup>2</sup> ·g <sup>-1</sup> )<br><sup>1)</sup> | Pore volume<br>(cm <sup>3</sup> ·g <sup>-1</sup> ) | Crystallites size <sup>b</sup><br>(nm) |
|------------------------------------|-----------------------|-------------------------------------------|-------------------------------------------------------------------------|----------------------------------------------------|----------------------------------------|
| Al <sub>2</sub> O <sub>3</sub> -3  | 3.8, 6.5              | 16.4                                      | 426                                                                     | 1.75                                               | 3.5                                    |
| Al <sub>2</sub> O <sub>3</sub> -5  | 4.9, 9.2              | 18.2                                      | 419                                                                     | 1.90                                               | 3.8                                    |
| Al <sub>2</sub> O <sub>3</sub> -7  | 7.8, 12.3             | 24.1                                      | 330                                                                     | 1.99                                               | 4.6                                    |
| Al <sub>2</sub> O <sub>3</sub> -9  | 9.6, 17.7             | 27.7                                      | 309                                                                     | 2.14                                               | 4.9                                    |
| Al <sub>2</sub> O <sub>3</sub> -12 | 13.2, 20.5            | 26.1                                      | 279                                                                     | 1.82                                               | 6.0                                    |
| Al <sub>2</sub> O <sub>3</sub> -16 | 15.6, 25.9            | 27.7                                      | 261                                                                     | 1.80                                               | 6.7                                    |

<sup>a</sup> Average pore size = 4(Pore volume/S<sub>BET</sub>)

<sup>b</sup> Average diameter of Al<sub>2</sub>O<sub>3</sub> crystallite, obtained by XRD measurement.
